# Supplementary material
Source: Springer Nature journal article supplement (https://www.springermedizin.de/resource/supplementary/12955_2010_715_MOESM1_ESM.pdf/9561168)

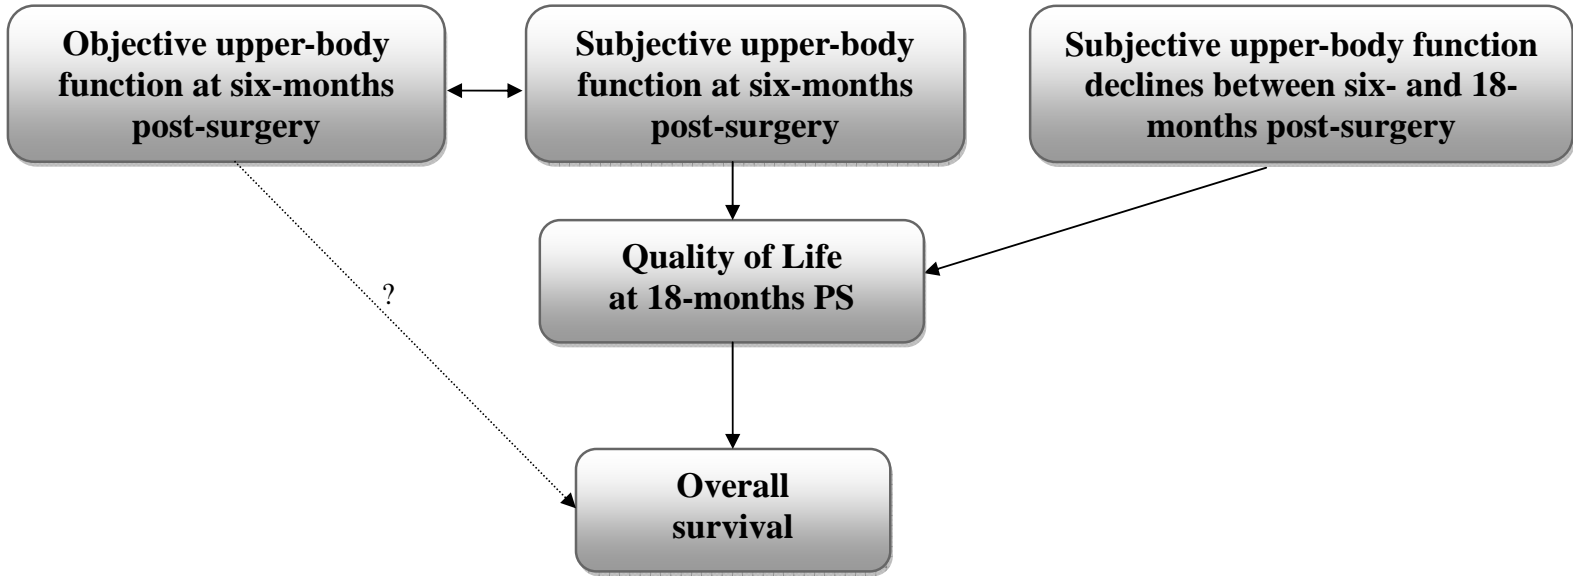

Supplement: MOESM1 [file 9561168]
